# Supplementary material
Source: Springer Nature journal article supplement (https://www.springermedizin.de/resource/supplementary/12939_2011_228_MOESM6_ESM.pdf/9550648)
Supplement: MOESM6 [file 9550648]

English language  
(February 2000-  
November 2010)  
abstracts screened n =  
2588

Abstracts excluded n = 2516

Abstracts retrieved for  
more detail n= 72

Abstracts excluded due to lack of  
available full text documents n = 16

Full text articles  
retrieved  
n = 56

Documents excluded n = 11

Not TB public- private  
collaboration = 1  
Articles of pre-PPM project  
intervention = 5  
Not project specific articles = 5

Articles and reports  
included in the  
analysis n = 45  
(43 articles, 2 reports)
